# Supplementary material for: LiRE(SO4)2(RE = Y, Gd, Eu): noncentrosymmetric chiral rare-earth sulfates with very large band gaps
Source: Royal Society of Chemistry journal article supplement (doi:10.1039/d2qm00983h), 2022-11-30

Electronic supplementary information (ESI) for

# LiRE(SO<sub>4</sub>)<sub>2</sub> (RE = Y, Gd, Eu): noncentrosymmetric chiral rare-earth sulfates with very large band gaps

*Sunghwan Cho and Kang Min Ok\**

Department of Chemistry, Sogang University, Seoul 04107, Republic of Korea

\*E-mail: kmok@sogang.ac.kr

## Table of contents

| Sections          | Titles                                                                                                                                                                   | page |
|-------------------|--------------------------------------------------------------------------------------------------------------------------------------------------------------------------|------|
| <b>Table S1.</b>  | Selected bond distances (Å) of LiY(SO <sub>4</sub> ) <sub>2</sub> .                                                                                                      | S2   |
| <b>Table S2.</b>  | Selected bond distances (Å) of LiGd(SO <sub>4</sub> ) <sub>2</sub> .                                                                                                     | S2   |
| <b>Table S3.</b>  | Selected bond distances (Å) of LiEu(SO <sub>4</sub> ) <sub>2</sub> .                                                                                                     | S2   |
| <b>Table S4.</b>  | Selected bond angles (°) of LiY(SO <sub>4</sub> ) <sub>2</sub> .                                                                                                         | S3   |
| <b>Table S5.</b>  | Selected bond angles (°) of LiGd(SO <sub>4</sub> ) <sub>2</sub> .                                                                                                        | S3   |
| <b>Table S6.</b>  | Selected bond angles (°) of LiEu(SO <sub>4</sub> ) <sub>2</sub> .                                                                                                        | S3   |
| <b>Table S7.</b>  | Bond valence sum calculations for LiRE(SO <sub>4</sub> ) <sub>2</sub> (RE = Y, Gd, Eu).                                                                                  | S3   |
| <b>Table S8.</b>  | Atomic coordinates (Å) and isotropic displacement parameters (Å <sup>2</sup> ) for LiY(SO <sub>4</sub> ) <sub>2</sub> .                                                  | S4   |
| <b>Table S9.</b>  | Atomic coordinates (Å) and isotropic displacement parameters (Å <sup>2</sup> ) for LiGd(SO <sub>4</sub> ) <sub>2</sub> .                                                 | S4   |
| <b>Table S10.</b> | Atomic coordinates (Å) and isotropic displacement parameters (Å <sup>2</sup> ) for LiEu(SO <sub>4</sub> ) <sub>2</sub> .                                                 | S4   |
| <b>Figure S1.</b> | Calculated and experimental powder X-ray diffraction patterns of LiRE(SO <sub>4</sub> ) <sub>2</sub> , (RE = Y, Ga, and Eu).                                             | S5   |
| <b>Figure S2.</b> | IR spectra of LiRE(SO <sub>4</sub> ) <sub>2</sub> (RE = Y, Gd, Eu).                                                                                                      | S5   |
| <b>Figure S3.</b> | TGA diagrams of LiY(SO <sub>4</sub> ) <sub>2</sub> , LiGd(SO <sub>4</sub> ) <sub>2</sub> , and LiEu(SO <sub>4</sub> ) <sub>2</sub> .                                     | S6   |
| <b>Figure S4.</b> | PXRD patterns of LiRE(SO <sub>4</sub> ) <sub>2</sub> after heating at 600–820 °C.                                                                                        | S7   |
| <b>Figure S5.</b> | PXRD patterns of LiRE(SO <sub>4</sub> ) <sub>2</sub> after heating at 1000 °C.                                                                                           | S8   |
| <b>Figure S6.</b> | Band structures of (a) LiY(SO <sub>4</sub> ) <sub>2</sub> , (b) LiGd(SO <sub>4</sub> ) <sub>2</sub> , and (c) LiEu(SO <sub>4</sub> ) <sub>2</sub> .                      | S9   |
| <b>Figure S7.</b> | Total and partial density of states for (a) LiY(SO <sub>4</sub> ) <sub>2</sub> , (b) LiGd(SO <sub>4</sub> ) <sub>2</sub> , and (c) LiEu(SO <sub>4</sub> ) <sub>2</sub> . | S10  |

**Table S1.** Selected bond distances (Å) of LiY(SO<sub>4</sub>)<sub>2</sub>.

|            |            |
|------------|------------|
| Li(1)-O(2) | 1.9172(15) |
| Y(1)-O(1)  | 2.2921(16) |
| Y(1)-O(2)  | 2.4449(14) |
| S(1)-O(1)  | 1.4622(16) |
| S(1)-O(2)  | 1.4839(15) |

**Table S2.** Selected bond distances (Å) of LiGd(SO<sub>4</sub>)<sub>2</sub>.

|            |            |
|------------|------------|
| Li(1)-O(2) | 1.9332(16) |
| Gd(1)-O(1) | 2.3312(18) |
| Gd(1)-O(2) | 2.4774(16) |
| S(1)-O(1)  | 1.4634(18) |
| S(1)-O(2)  | 1.4862(16) |

**Table S3.** Selected bond distances (Å) of LiEu(SO<sub>4</sub>)<sub>2</sub>.

|            |            |
|------------|------------|
| Li(1)-O(2) | 1.9378(18) |
| Eu(1)-O(1) | 2.342(2)   |
| Eu(1)-O(2) | 2.4881(18) |
| S(1)-O(1)  | 1.462(2)   |
| S(1)-O(2)  | 1.4857(18) |

**Table S4.** Selected bond angles (°) of LiY(SO<sub>4</sub>)<sub>2</sub>.

|                 |            |                |           |
|-----------------|------------|----------------|-----------|
| O(2)-Li(1)-O(2) | 100.24(4)  | O(1)-Y(1)-O(1) | 151.73(8) |
| O(2)-Li(1)-O(2) | 130.12(10) | O(1)-Y(1)-O(2) | 83.12(6)  |
| O(1)-S(1)-O(1)  | 109.88(14) | O(1)-Y(1)-O(2) | 130.40(5) |
| O(1)-S(1)-O(2)  | 111.47(9)  | O(1)-Y(1)-O(2) | 77.35(6)  |
| O(1)-S(1)-O(2)  | 110.12(10) | O(1)-Y(1)-O(2) | 71.96(6)  |
| O(2)-S(1)-O(2)  | 103.66(11) | O(2)-Y(1)-O(2) | 130.60(7) |
| O(1)-Y(1)-O(1)  | 101.52(9)  | O(2)-Y(1)-O(2) | 153.38(8) |
| O(1)-Y(1)-O(1)  | 85.38(9)   | O(2)-Y(1)-O(2) | 57.00(7)  |

**Table S5.** Selected bond angles (°) of LiGd(SO<sub>4</sub>)<sub>2</sub>.

|                  |            |                 |           |
|------------------|------------|-----------------|-----------|
| O(2)-Li(1)-O(2)0 | 100.21(4)  | O(1)-Gd(1)-O(1) | 102.13(9) |
| O(2)-Li(1)-O(2)  | 130.21(11) | O(1)-Gd(1)-O(2) | 130.27(6) |
| O(1)-S(1)-O(1)   | 110.08(15) | O(1)-Gd(1)-O(2) | 77.60(6)  |
| O(1)-S(1)-O(2)   | 111.18(10) | O(1)-Gd(1)-O(2) | 72.28(6)  |
| O(1)-S(1)-O(2)   | 110.00(11) | O(1)-Gd(1)-O(2) | 82.69(6)  |
| O(2)-S(1)-O(2)   | 104.27(13) | O(2)-Gd(1)-O(2) | 56.53(7)  |
| O(1)-Gd(1)-O(1)  | 151.63(9)  | O(2)-Gd(1)-O(2) | 131.21(7) |
| O(1)-Gd(1)-O(1)  | 84.83(9)   | O(2)-Gd(1)-O(2) | 153.21(9) |

**Table S6.** Selected bond angles (°) of LiEu(SO<sub>4</sub>)<sub>2</sub>.

|                 |            |                 |            |
|-----------------|------------|-----------------|------------|
| O(2)-Li(1)-O(2) | 100.40(5)  | O(1)-Eu(1)-O(1) | 102.51(10) |
| O(2)-Li(1)-O(2) | 129.72(13) | O(1)-Eu(1)-O(2) | 77.65(7)   |
| O(1)-S(1)-O(1)  | 109.93(17) | O(1)-Eu(1)-O(2) | 129.98(7)  |
| O(1)-S(1)-O(2)  | 111.07(12) | O(1)-Eu(1)-O(2) | 82.75(7)   |
| O(1)-S(1)-O(2)  | 110.11(12) | O(1)-Eu(1)-O(2) | 72.41(7)   |
| O(2)-S(1)-O(2)  | 104.45(14) | O(2)-Eu(1)-O(2) | 56.33(8)   |
| O(1)-Eu(1)-O(1) | 151.87(10) | O(2)-Eu(1)-O(2) | 131.29(8)  |
| O(1)-Eu(1)-O(1) | 84.35(10)  | O(2)-Eu(1)-O(2) | 153.46(10) |

**Table S7.** Bond valence sum calculations for LiRE(SO<sub>4</sub>)<sub>2</sub> (RE = Y, Gd, Eu).

| LiY(SO <sub>4</sub> ) <sub>2</sub> |      | LiGd(SO <sub>4</sub> ) <sub>2</sub> |      | LiEu(SO <sub>4</sub> ) <sub>2</sub> |      |
|------------------------------------|------|-------------------------------------|------|-------------------------------------|------|
| Li1                                | 1.18 | Li1                                 | 1.13 | Li1                                 | 1.12 |
| Y1                                 | 3.13 | Gd1                                 | 3.26 | Eu1                                 | 3.24 |
| S1                                 | 6.02 | S1                                  | 5.99 | S1                                  | 6.01 |
| O1                                 | 2.02 | O1                                  | 2.03 | O1                                  | 2.06 |
| O2                                 | 2.07 | O2                                  | 2.06 | O2                                  | 2.04 |

**Table S8.** Atomic coordinates (Å) and equivalent isotropic displacement parameters (Å<sup>2</sup>) for LiY(SO<sub>4</sub>)<sub>2</sub>.

|              | Wyck. | x           | y          | z         | U(eq)       |
|--------------|-------|-------------|------------|-----------|-------------|
| <b>Li(1)</b> | 2b    | 0.5         | 0.5        | 1         | 0.0143(17)  |
| <b>Y(1)</b>  | 2d    | 0.5         | 0          | 0.25      | 0.00650(14) |
| <b>S(1)</b>  | 4f    | 0.28622(5)  | 0.21378(5) | 0.75      | 0.00718(16) |
| <b>O(1)</b>  | 8i    | 0.4169(2)   | 0.1876(2)  | 0.5571(3) | 0.0149(3)   |
| <b>O(2)</b>  | 8i    | 0.29599(19) | 0.3948(2)  | 0.8526(3) | 0.0109(3)   |

$U(\text{eq})$  is defined as one third of the trace of the orthogonalized  $U^{\#}$  tensor.

**Table S9.** Atomic coordinates (Å) and equivalent isotropic displacement parameters (Å<sup>2</sup>) for LiGd(SO<sub>4</sub>)<sub>2</sub>.

|              | Wyck. | x          | y          | z         | U(eq)       |
|--------------|-------|------------|------------|-----------|-------------|
| <b>Li(1)</b> | 2b    | 0.5        | 0.5        | 1         | 0.016(2)    |
| <b>Gd(1)</b> | 2d    | 0.5        | 0          | 0.25      | 0.00723(9)  |
| <b>S(1)</b>  | 4f    | 0.28662(6) | 0.21338(6) | 0.75      | 0.00817(13) |
| <b>O(1)</b>  | 8i    | 0.4172(2)  | 0.1886(2)  | 0.5600(3) | 0.0170(4)   |
| <b>O(2)</b>  | 8i    | 0.2969(2)  | 0.3927(2)  | 0.8534(3) | 0.0118(3)   |

$U(\text{eq})$  is defined as one third of the trace of the orthogonalized  $U^{\#}$  tensor.

**Table S10.** Atomic coordinates (Å) and equivalent isotropic displacement parameters (Å<sup>2</sup>) for LiEu(SO<sub>4</sub>)<sub>2</sub>.

|              | Wyck. | x          | Y          | z         | U(eq)       |
|--------------|-------|------------|------------|-----------|-------------|
| <b>Li(1)</b> | 2b    | 0.5        | 0.5        | 1         | 0.016(2)    |
| <b>Eu(1)</b> | 2d    | 0.5        | 0          | 0.25      | 0.00732(11) |
| <b>S(1)</b>  | 4f    | 0.28692(6) | 0.21308(6) | 0.75      | 0.00821(15) |
| <b>O(1)</b>  | 8i    | 0.4171(3)  | 0.1881(3)  | 0.5612(4) | 0.0174(4)   |
| <b>O(2)</b>  | 8i    | 0.2976(2)  | 0.3921(2)  | 0.8524(4) | 0.0118(3)   |

$U(\text{eq})$  is defined as one third of the trace of the orthogonalized  $U^{\#}$  tensor.

**Figure S1.** Calculated and experimental powder X-ray diffraction patterns of  $\text{LiRE}(\text{SO}_4)_2$ , (RE = Y, Ga, and Eu).

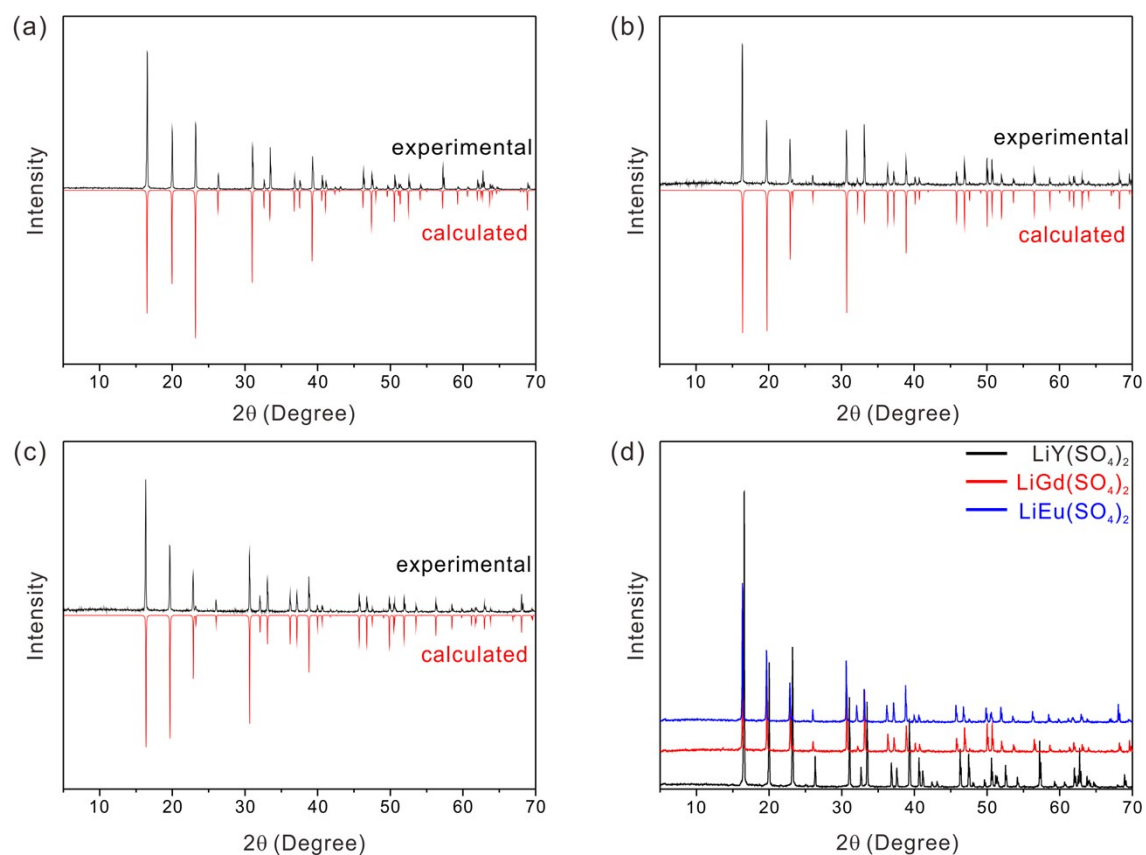

**Figure S2.** IR spectra of  $\text{LiRE}(\text{SO}_4)_2$  (RE = Y, Gd, Eu).

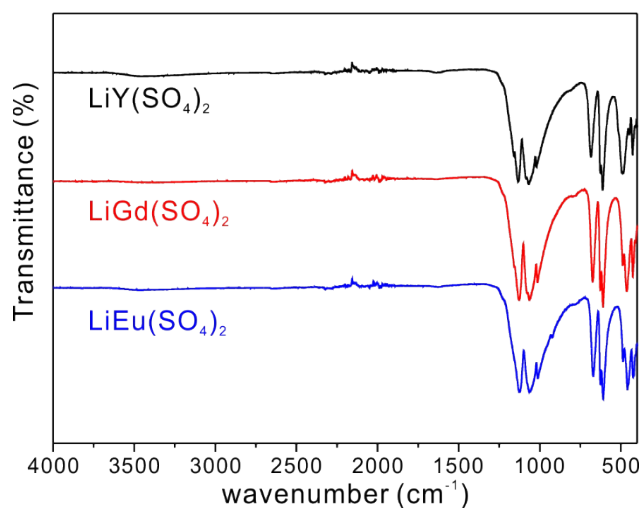

**Figure S3.** TGA diagrams of (a)  $\text{LiY}(\text{SO}_4)_2$ , (b)  $\text{LiGd}(\text{SO}_4)_2$ , and (c)  $\text{LiEu}(\text{SO}_4)_2$ .

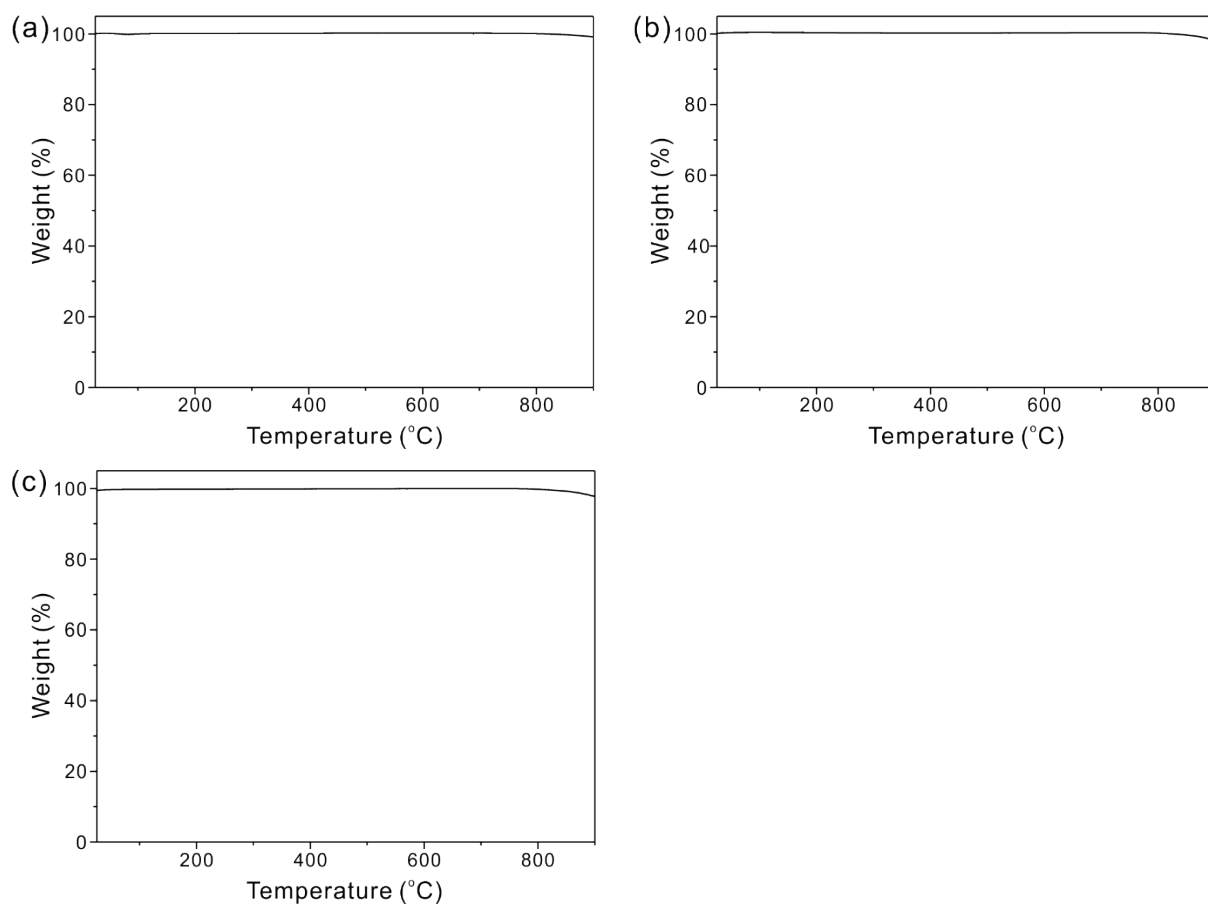

**Figure S4.** Powder X-ray diffraction patterns of (a)  $\text{LiY}(\text{SO}_4)_2$ , (b)  $\text{LiGd}(\text{SO}_4)_2$ , and (c)  $\text{LiEu}(\text{SO}_4)_2$  after heating at 600 °C, 650 °C, and 820 °C, respectively, for 24 h.

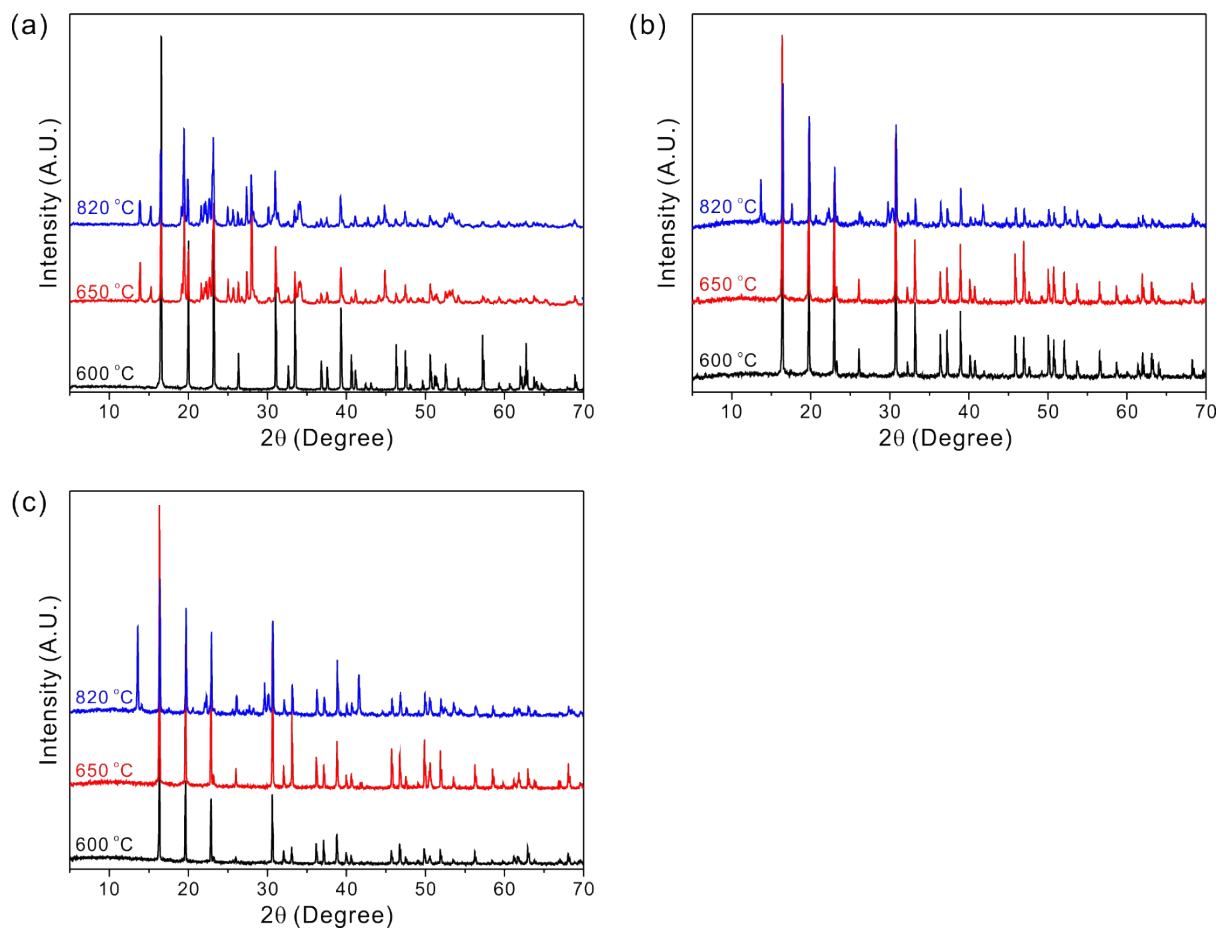

**Figure S5.** Powder X-ray diffraction patterns of (a), (b)  $\text{LiY}(\text{SO}_4)_2$ , (c), (d)  $\text{LiGd}(\text{SO}_4)_2$ , and (e), (f)  $\text{LiEu}(\text{SO}_4)_2$  after heating at 1000 °C for 2h [(a), (c), (e)] and for 14h [(b), (d), (f)], respectively.

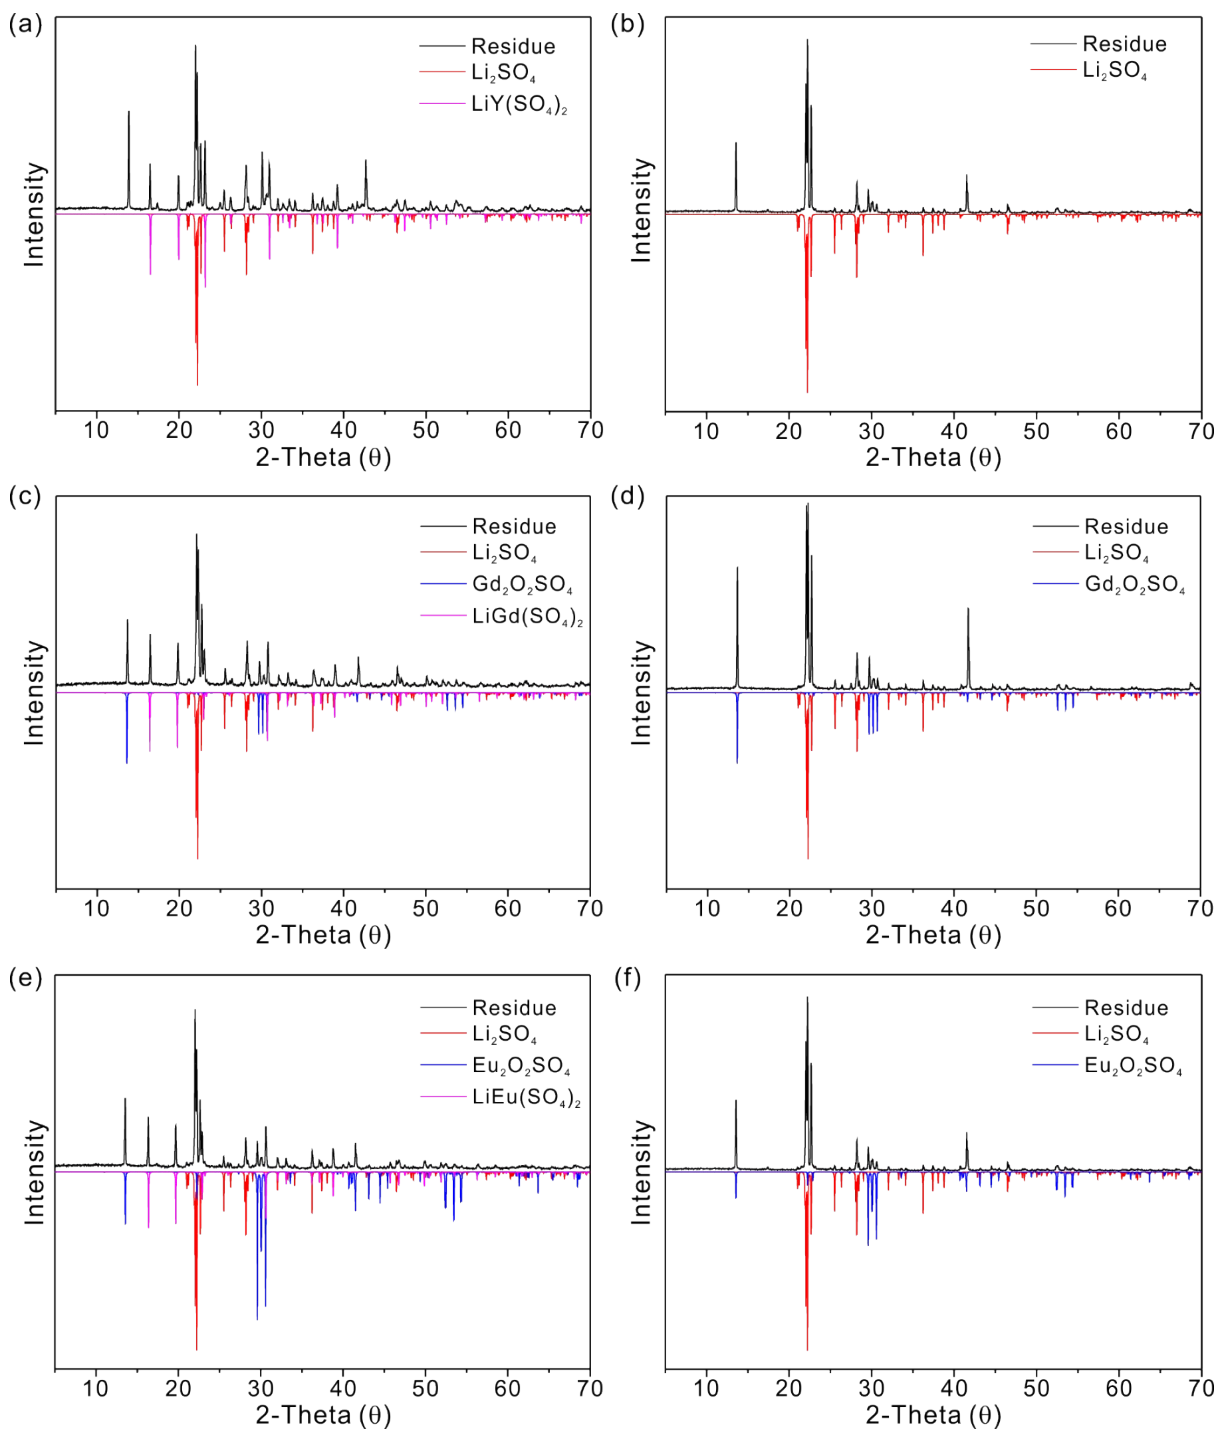

Peaks that are not assigned in (a) and (b) are supposed to be  $\text{Y}_2\text{O}_2\text{SO}_4$ , but its precise structural data were not reported.



**Figure S6.** Band structures of (a)  $\text{LiY}(\text{SO}_4)_2$ , (b)  $\text{LiGd}(\text{SO}_4)_2$ , and (c)  $\text{LiEu}(\text{SO}_4)_2$ .

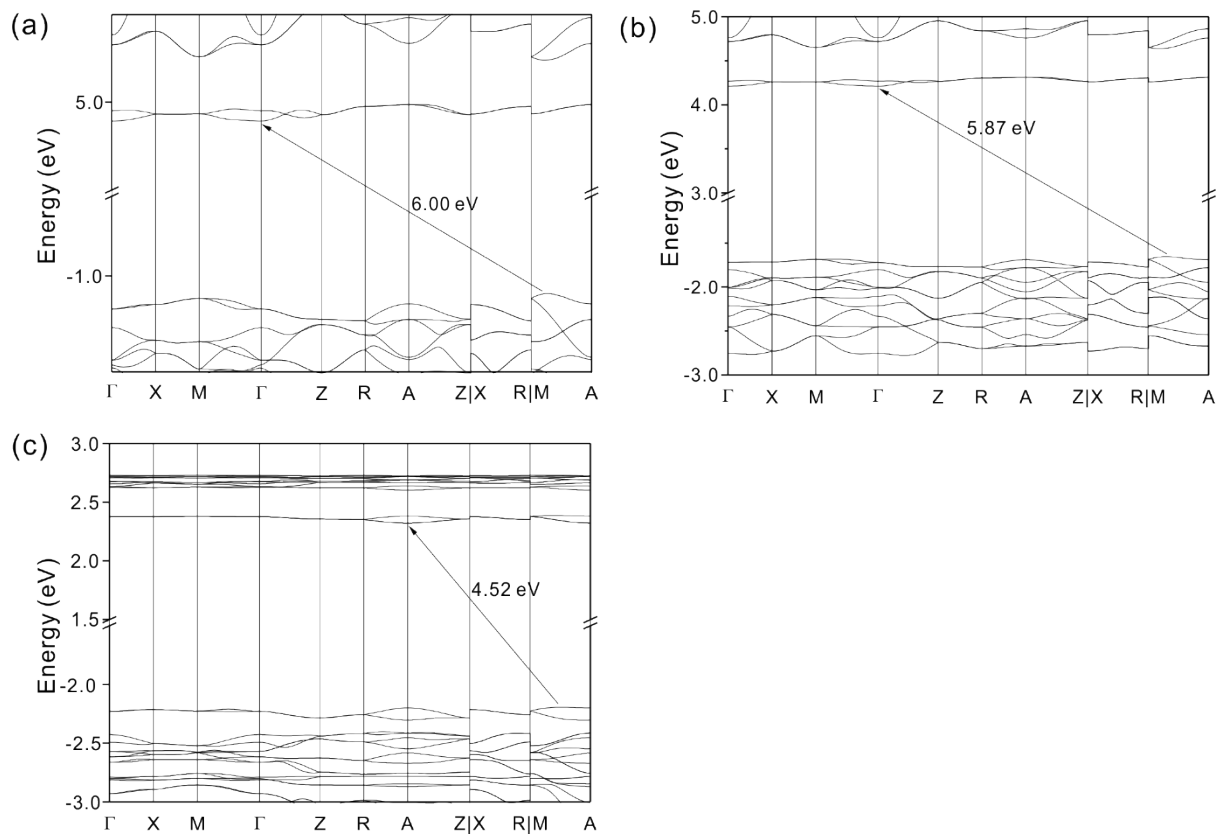

**Figure S7.** Total and partial density of states for (a)  $\text{LiY}(\text{SO}_4)_2$ , (b)  $\text{LiGd}(\text{SO}_4)_2$ , and (c)  $\text{LiEu}(\text{SO}_4)_2$ . The Fermi level is represented at 0 eV.

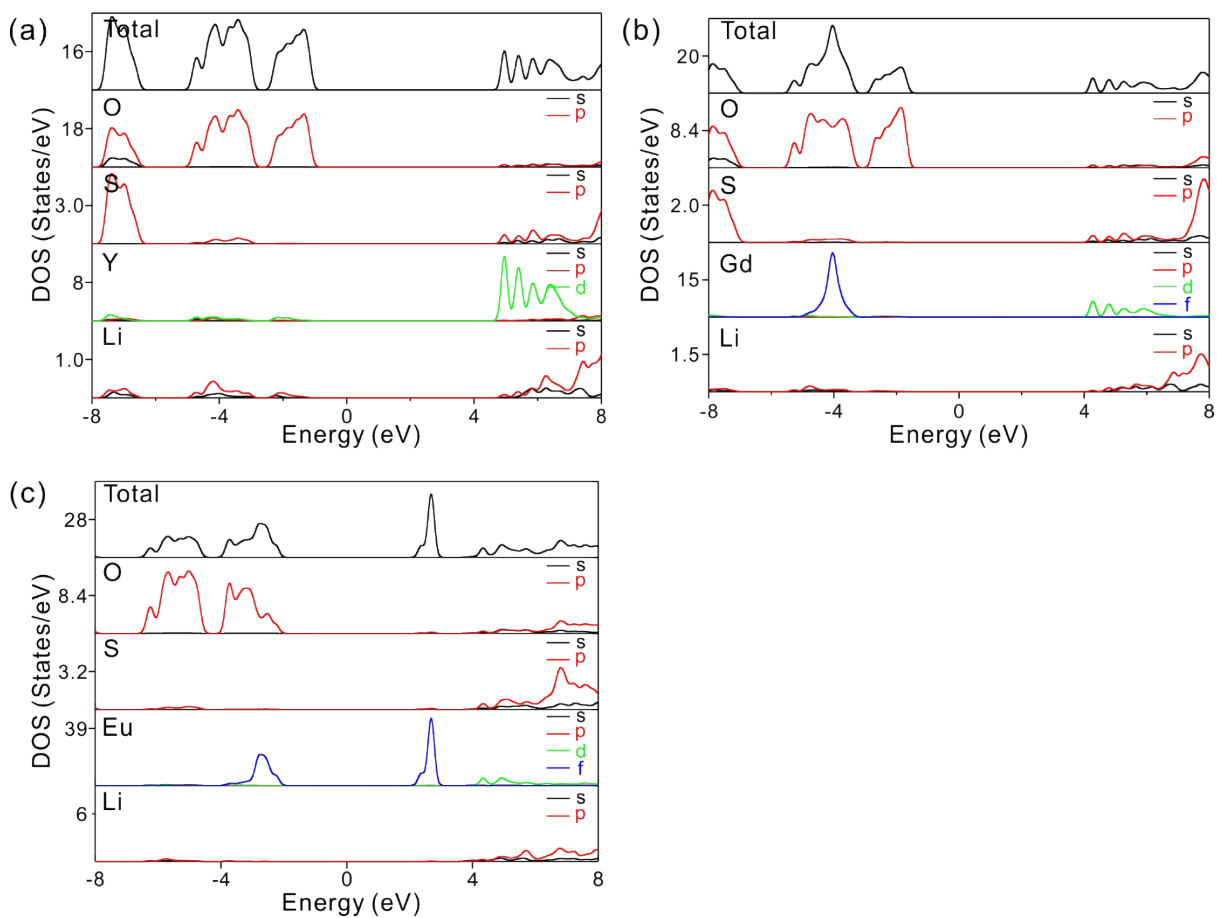

Supplement: d2qm00983h1.pdf [file d2qm00983h1.pdf]
